# Supplementary material for: Proanthocyanidins-Mediated Nrf2 Activation Ameliorates Glucocorticoid-Induced Oxidative Stress and Mitochondrial Dysfunction in Osteoblasts
Source: PubMed Central journal article supplement (PMC7533007; doi:10.1155/2020/9102012), 2020-09-25
Supplement: 9102012.f1.pdf [file 9102012.f1.pdf]

## **1. Materials and Methods**

1.1 Cytotoxicity assay. The effect of PAC and Dex on osteoblast viability was determined using the Cell Counting Kit-8 (CCK-8) assay (MedChemExpress LLC; Monmouth Junction, NJ, USA). The cells were seeded in a 96-well plate at the density of  $5 \times 10^3$  cells per well and received following treatment: ① PAC treatment (0, 0.25, 0.50, 1, 5 and 10  $\mu$ M) for 48 hours; ② Osteoblasts were pretreated with 5  $\mu$ M Dexamethasone for 48 hours and then co-cultured with 1  $\mu$ M PAC for another indicated time (0, 12, 24, 48, 72, 96 hours), the medium was replaced with normal complete DMEM after aforementioned treating time. After treatment, 10  $\mu$ l CCK8 reagent was added to each well and the cells were incubated for another 2 hours. The absorbance or optical density (OD) at 450 nm was measured using Multiskan GO microdisk spectrophotometer (Thermo Fisher Science).

## **2. Results**

2.1 1  $\mu$ M is the maximum safe concentration of PAC on osteoblast viability. After 48-hour treatment, we found 1  $\mu$ M PAC is the optimum concentration for osteoblast viability.

2.2 Prolonged treating time did not leads to a higher osteoblast viability. As we did in our previous experiment, we found there was no significant difference in cell viability between 48 hours and a prolonged treating time. To this end, we selected 48 hours as our PAC treating time.

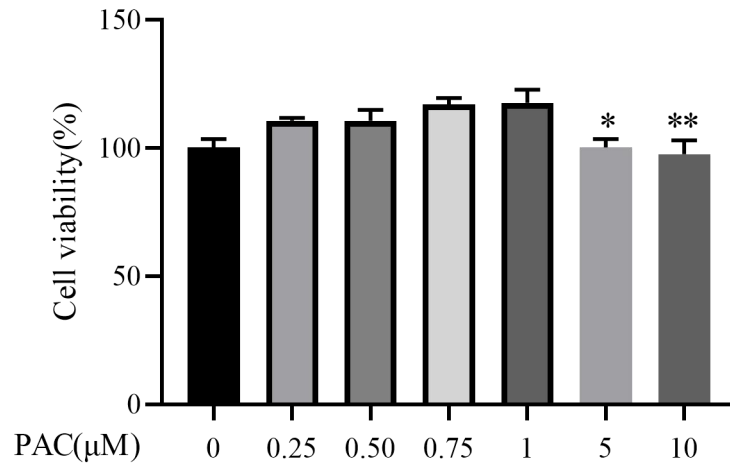

Figure 1: Effects of PAC on cell viability. Osteoblasts received different concentrations of PAC for 48 hours. The data in the figure represent the averages  $\pm$  SEM of 3 times in duplicates. \* $p < 0.01$ , \*\* $p < 0.01$  versus untreated group.

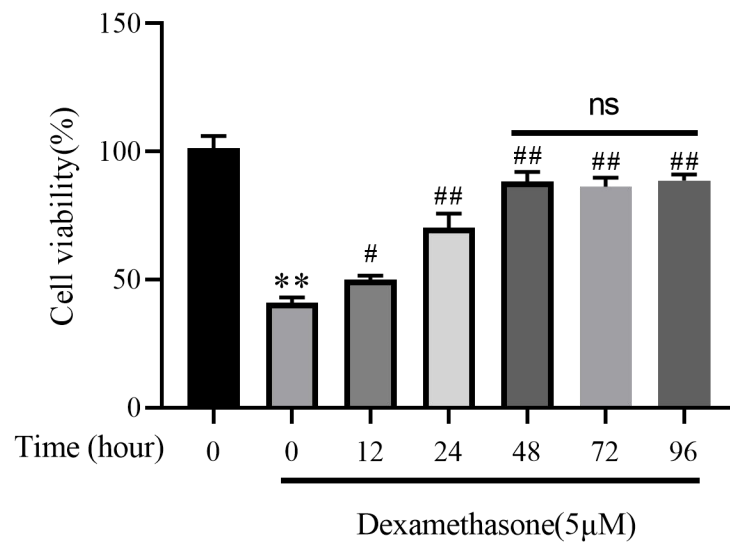

Figure 2: Effects of different treating time of PAC on Dex-induced osteoblast viability. Percentage of viable cells received indicated treatment. The data in the figure represent the averages  $\pm$  SEM of 3 times in duplicates. \*\* $p < 0.01$  versus untreated group, # $p < 0.05$ , ## $p < 0.01$  versus Dex group.
